# Supplementary material
Source: PubMed Central journal article supplement (PMC4596407)
Supplement: NIHMS726997-supplement-01.pdf [file NIHMS726997-supplement-01.pdf]

## Supporting Information

### **Biomonitoring of polycyclic aromatic hydrocarbons exposure in small groups of residents in Brisbane, Australia and Hanoi, Vietnam, and those travelling between the two cities**

Phong K. Thai, Zheng Li, Andreas Sjödin, Annette Fox, Nguyen Bich Diep, Ta Thi Binh, Jochen F. Mueller

Figure S1. Concentrations of 8 urinary OH-PAHs in the father who traveled between Brisbane, Australia and Hanoi, Vietnam

Figure S2. Concentrations of 8 urinary OH-PAHs in the son who traveled between Brisbane, Australia and Hanoi, Vietnam

Figure S3. Concentrations of 8 urinary OH-PAHs in the mother who traveled between Brisbane, Australia and Hanoi, Vietnam

Figure S4. Concentrations of 8 urinary OH-PAHs in the daughter who traveled between Brisbane, Australia and Hanoi, Vietnam

Figure S5. Effect of traveling from Brisbane to Hanoi and back to Brisbane on the concentrations of urinary PAH metabolites (Travel), and comparison to two control groups, residents of Brisbane and residents of Hanoi during the entire study period (a and b are significantly different,  $p < 0.01$ ).

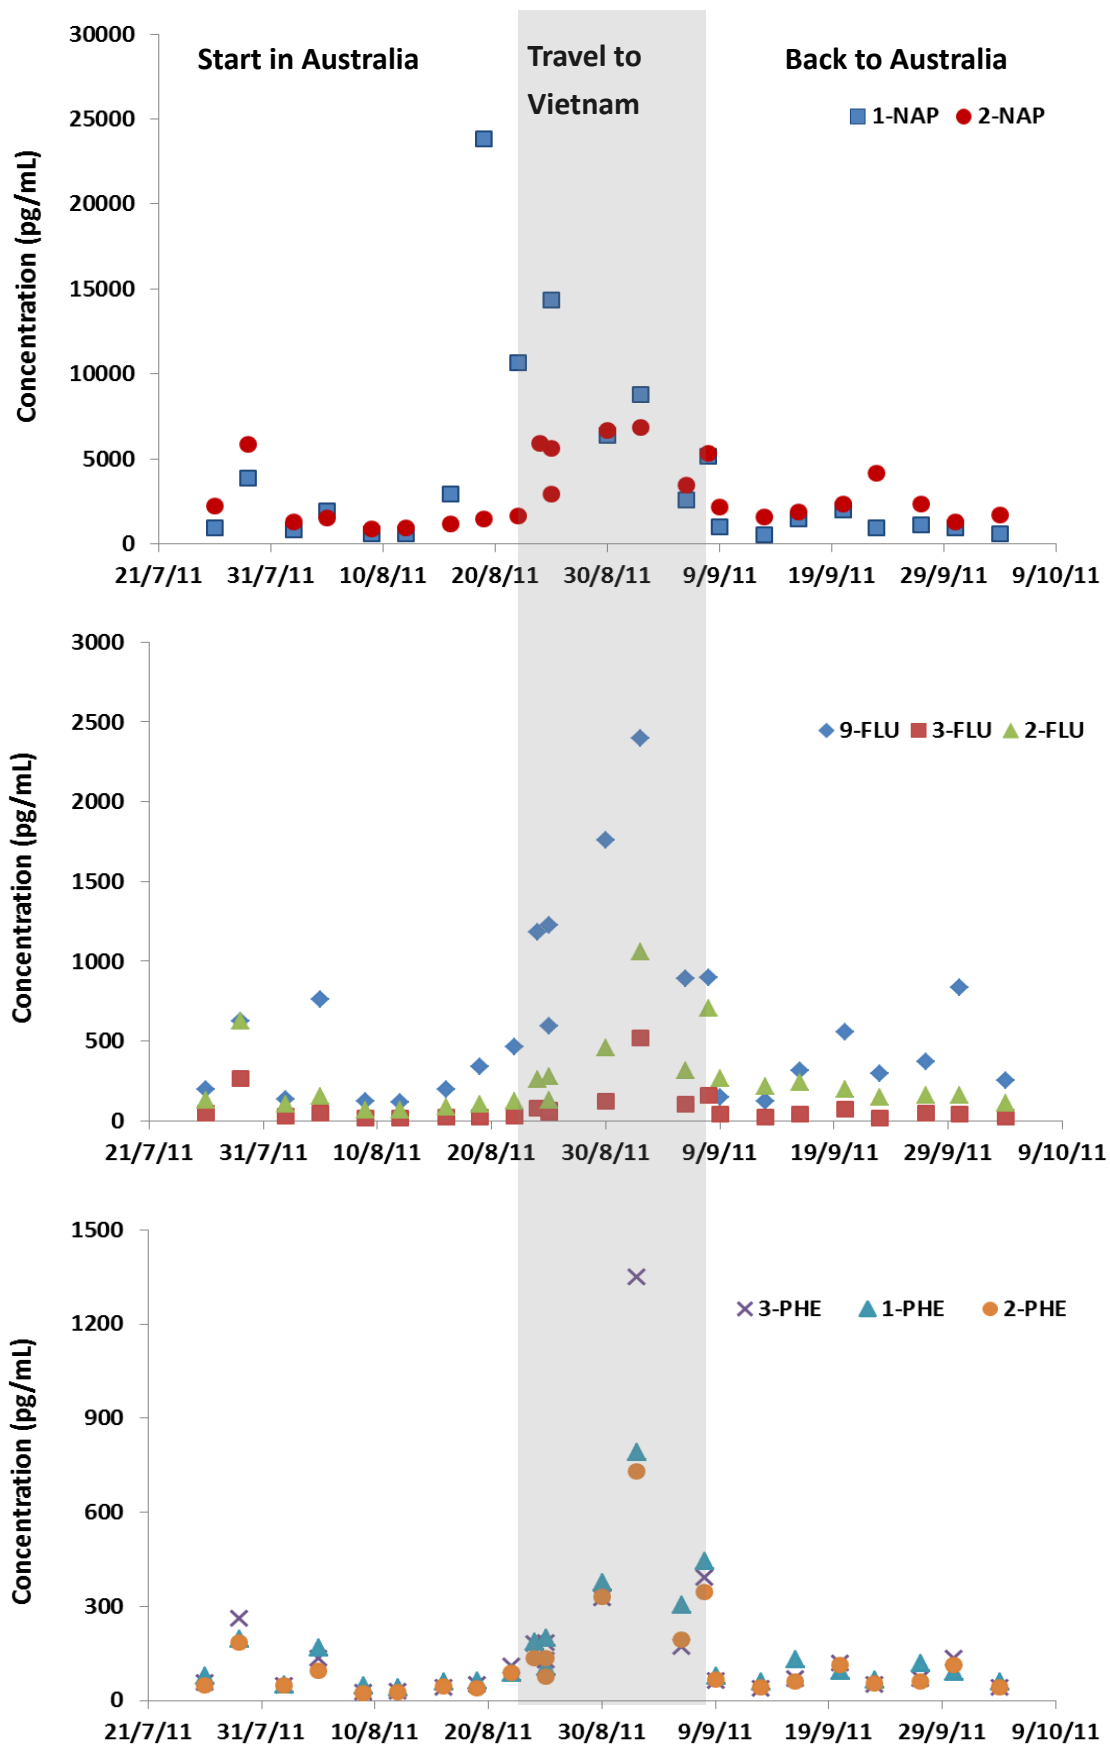

Figure S1. Concentrations of 8 urinary OH-PAHs in the father who traveled between Brisbane, Australia and Hanoi, Vietnam

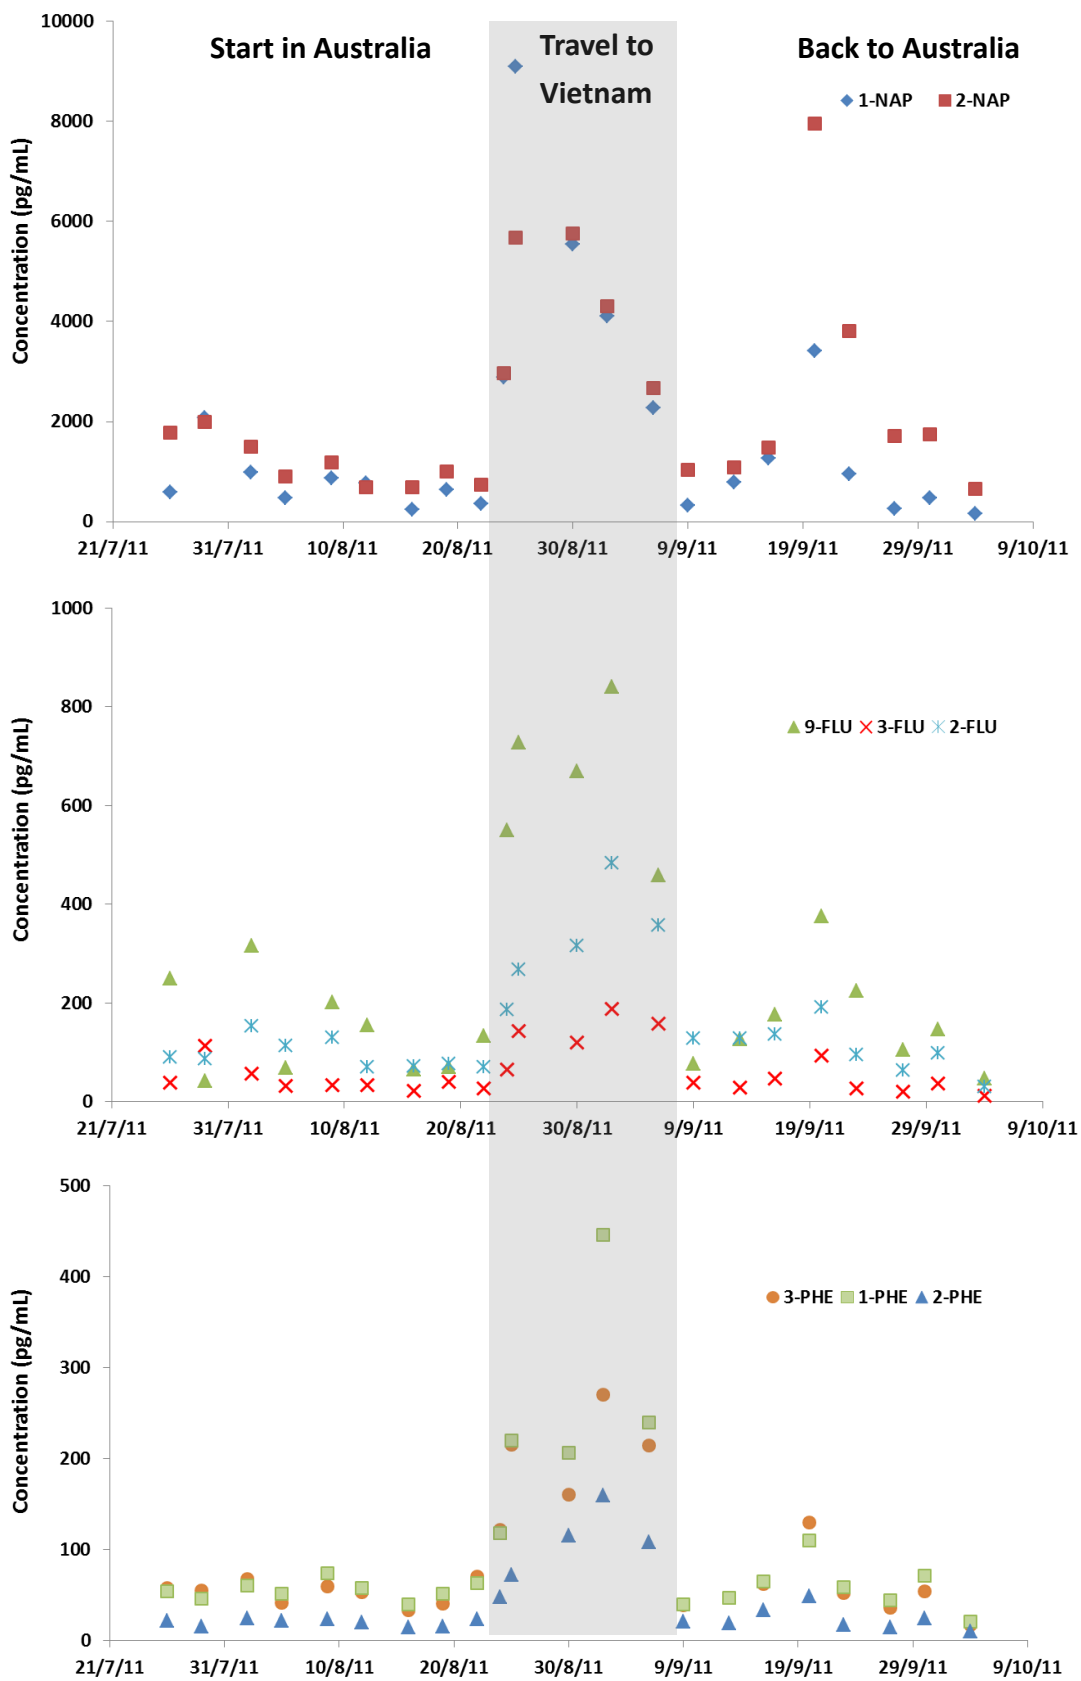

Figure S2. Concentrations of 8 urinary OH-PAHs in the son who traveled between Brisbane, Australia and Hanoi, Vietnam

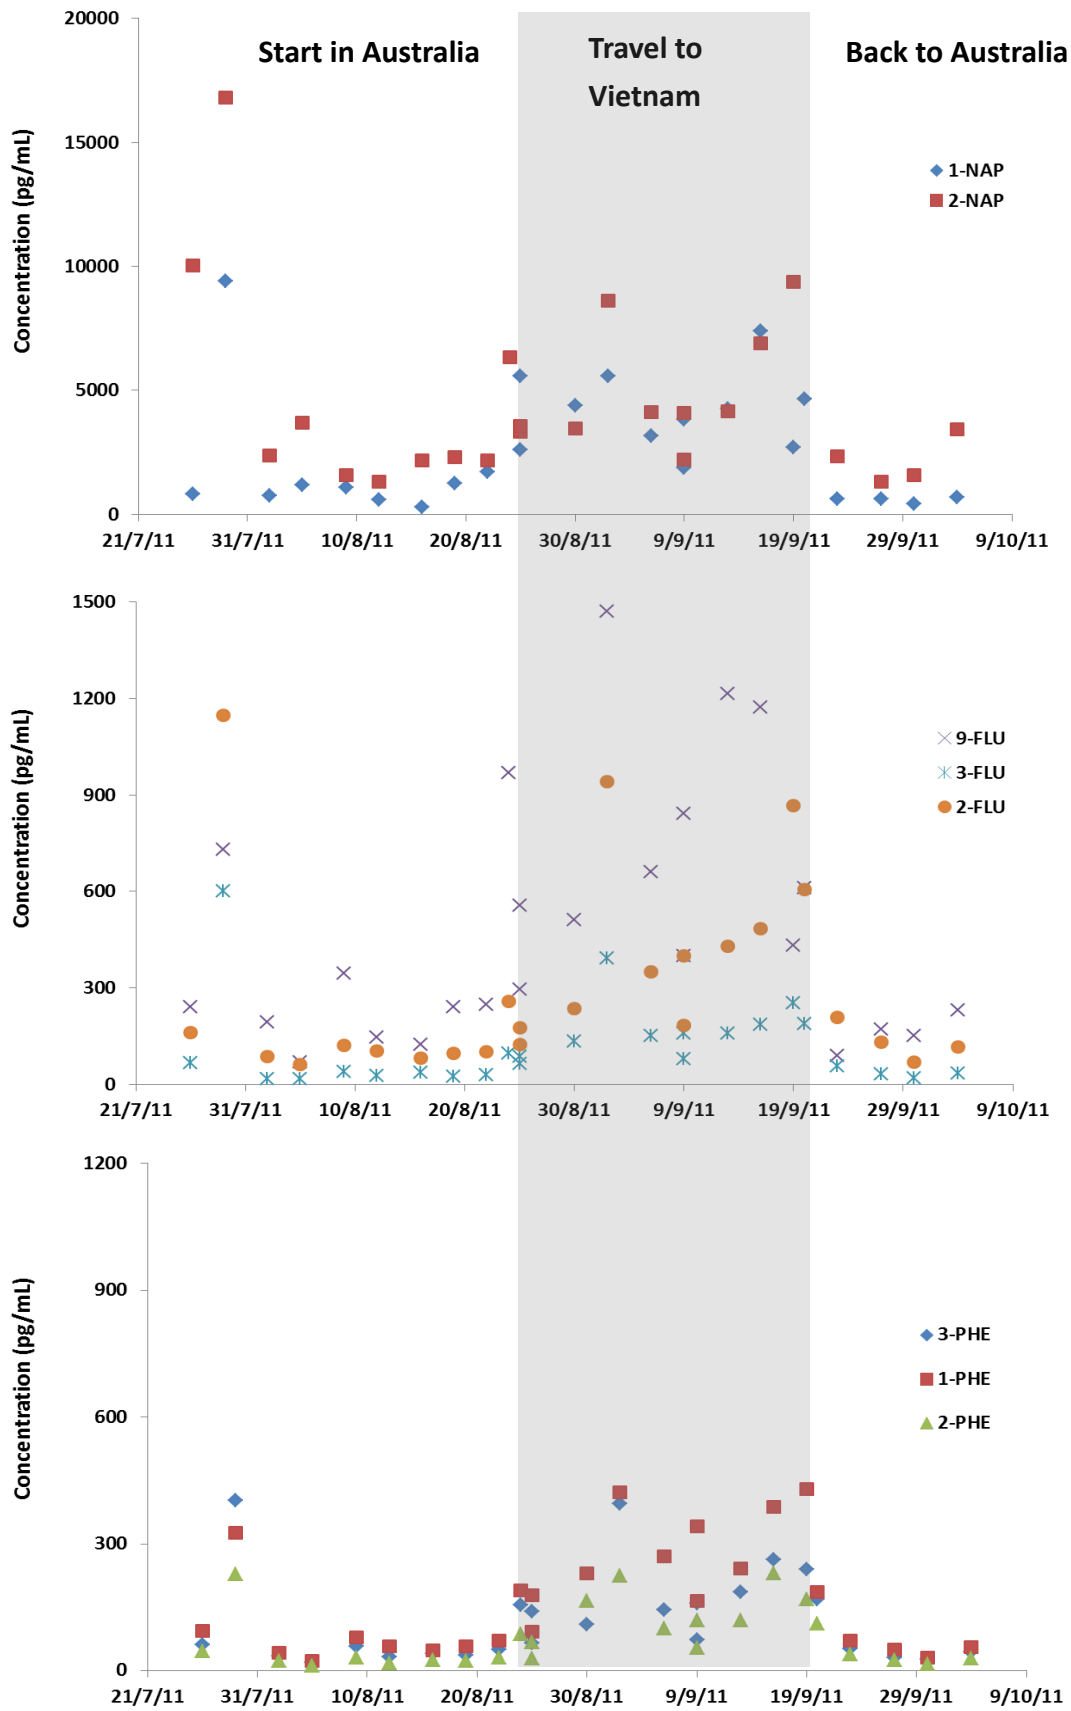

Figure S3. Concentrations of 8 urinary OH-PAHs in the mother who traveled between Brisbane, Australia and Hanoi, Vietnam

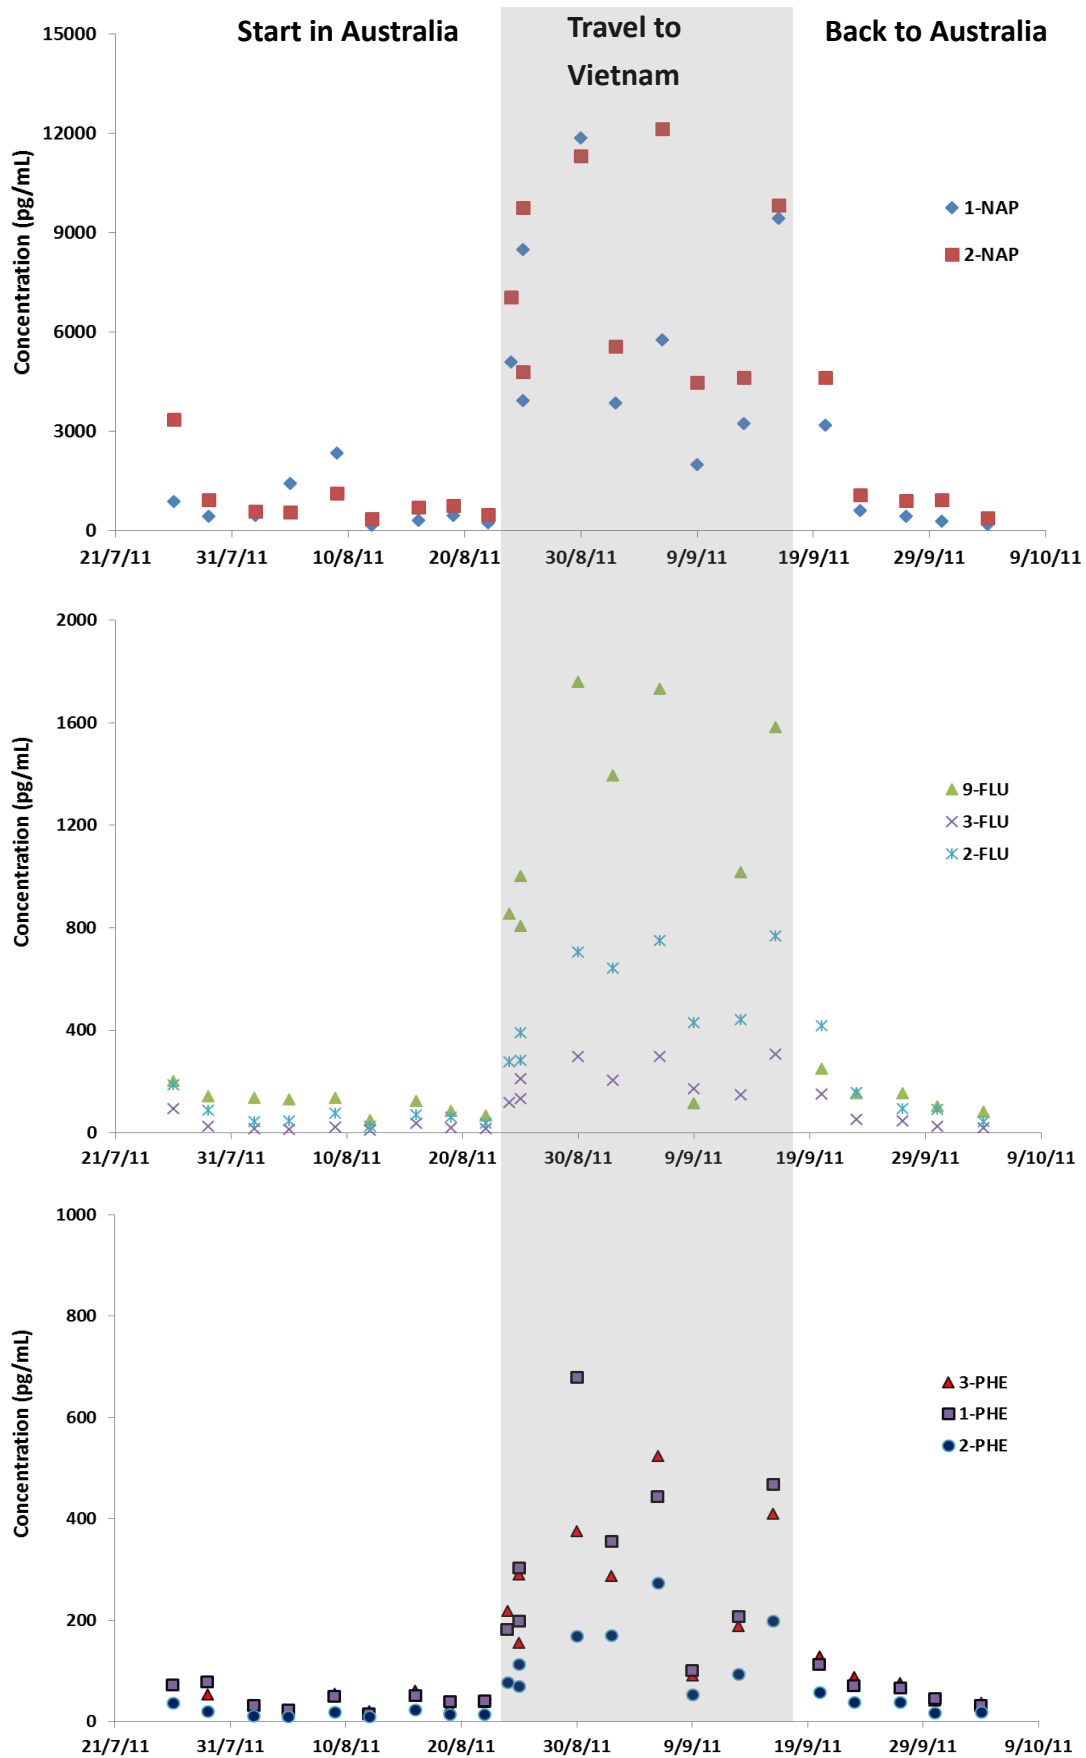

Figure S4. Concentrations of 8 urinary OH-PAHs in the daughter who traveled between Brisbane, Australia and Hanoi, Vietnam

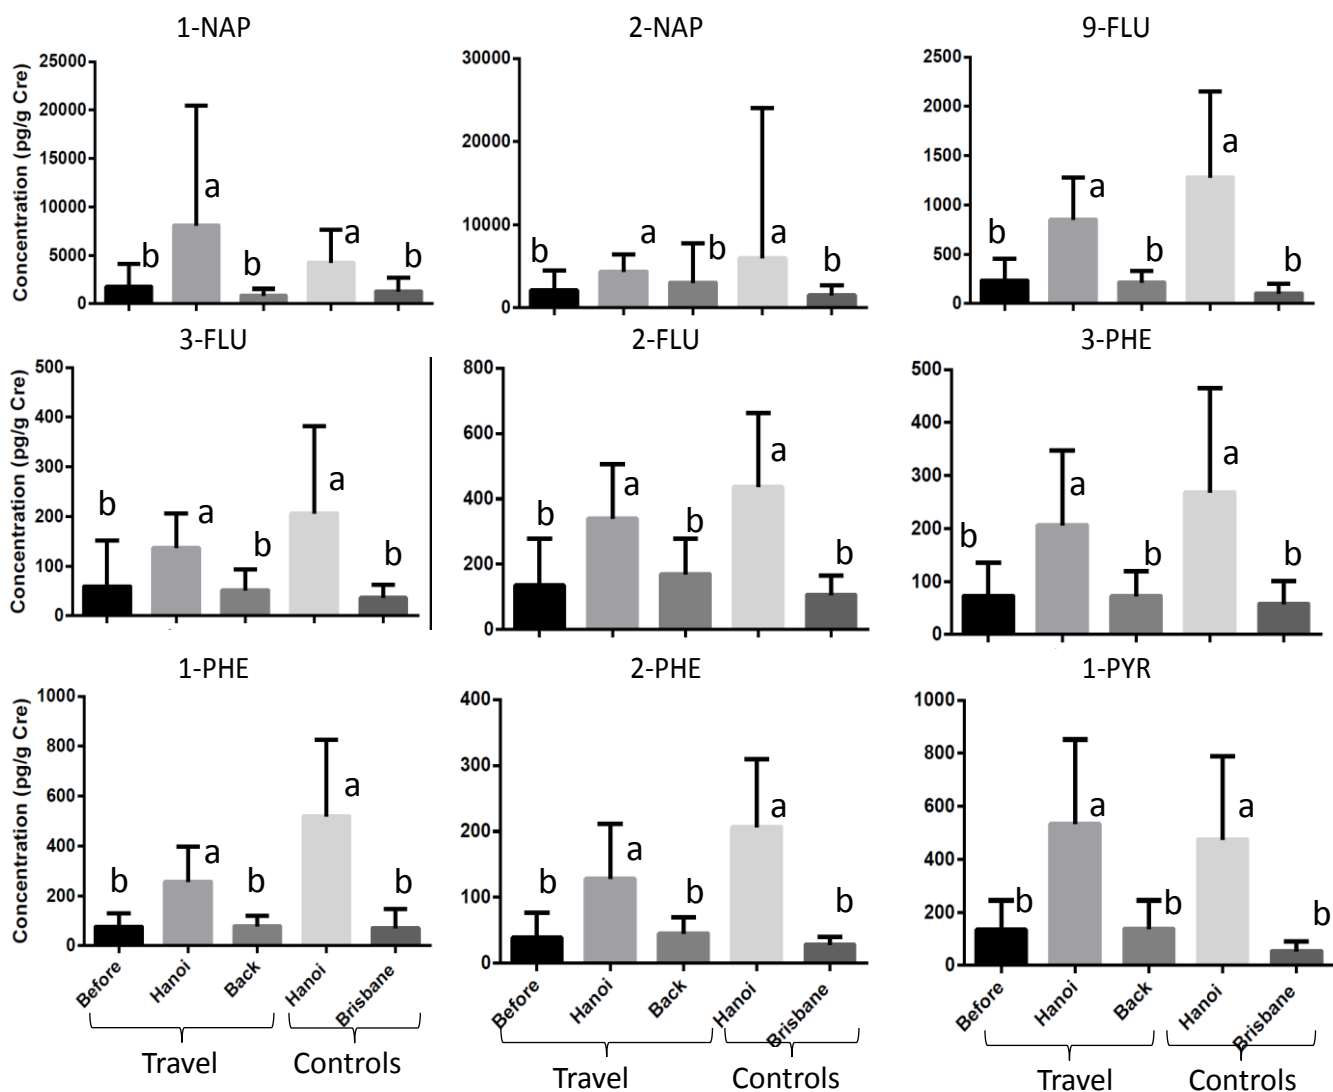

Figure S5. Effect of traveling from Brisbane to Hanoi and back to Brisbane on the concentrations of urinary PAH metabolites (Travel), and comparison to two control groups, residents of Brisbane and residents of Hanoi during the entire study period (a and b are significantly different,  $p < 0.01$ ).
